# Supplementary material for: β-Caryophyllene Counteracts Chemoresistance Induced by Cigarette Smoke in Triple-Negative Breast Cancer MDA-MB-468 Cells
Source: MDPI journal article supplement (doi:10.3390/biomedicines10092257), 2022-09-12
Supplement: s1 [file s1]

# $\beta$ -Caryophyllene Counteracts Chemoresistance Induced by Cigarette Smoke in Triple-Negative Breast Cancer MDA-MB-468 Cells

Antonella Di Sotto <sup>1,\*</sup>, Marco Gulli <sup>1</sup>, Marco Minacori <sup>2</sup>, Romina Mancinelli <sup>3</sup>, Stefania Garzoli <sup>4</sup>, Ester Percaccio <sup>1</sup>, Alessio Incocciati <sup>2</sup>, Donatella Romaniello <sup>2,5</sup>, Gabriela Mazzanti <sup>1,\*</sup>, Margherita Eufemi <sup>2</sup> and Silvia Di Giacomo <sup>1</sup>

<sup>1</sup> Department of Physiology and Pharmacology "V. Erspamer", Sapienza University of Rome, Piazzale Aldo Moro 5, 00185 Rome, Italy

<sup>2</sup> Department of Biochemical Science "A. Rossi Fanelli", Sapienza University of Rome, Piazzale Aldo Moro 5, 00185 Rome, Italy

<sup>3</sup> Department of Anatomical, Histological, Forensic and Orthopedic Sciences, Sapienza University of Rome, Piazzale Aldo Moro 5, 00185 Rome, Italy

<sup>4</sup> Department of Chemistry and Technology of Drugs, Sapienza University of Rome, Piazzale Aldo Moro 5, 00185 Rome, Italy

<sup>5</sup> Department of Experimental, Diagnostic and Specialty Medicine, University of Bologna, 40138 Bologna, Italy

\* Correspondence: antonella.disotto@uniroma1.it (A.D.S.); gabriela.mazzanti@uniroma1.it (G.M.)

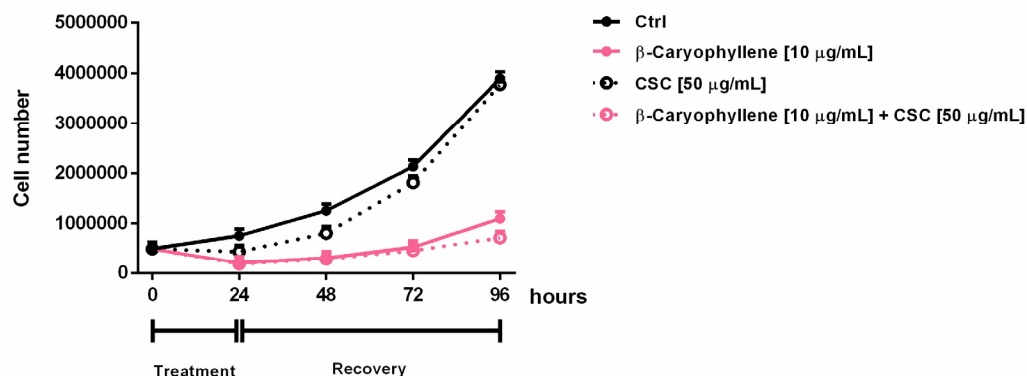

**Figure S1.** Effect of the co-treatment of  $\beta$ -caryophyllene and cigarette smoke condensate (CSC) in triple negative breast cancer MDA-MB-468 cells after 24 h exposure and subsequent 72 h cell recovery. Cell number was determined by trypan blue exclusion assay at each time point. Data are displayed as mean  $\pm$  standard error (SE) of at least two experiments with at least three technical replicates ( $n = 6$ ).

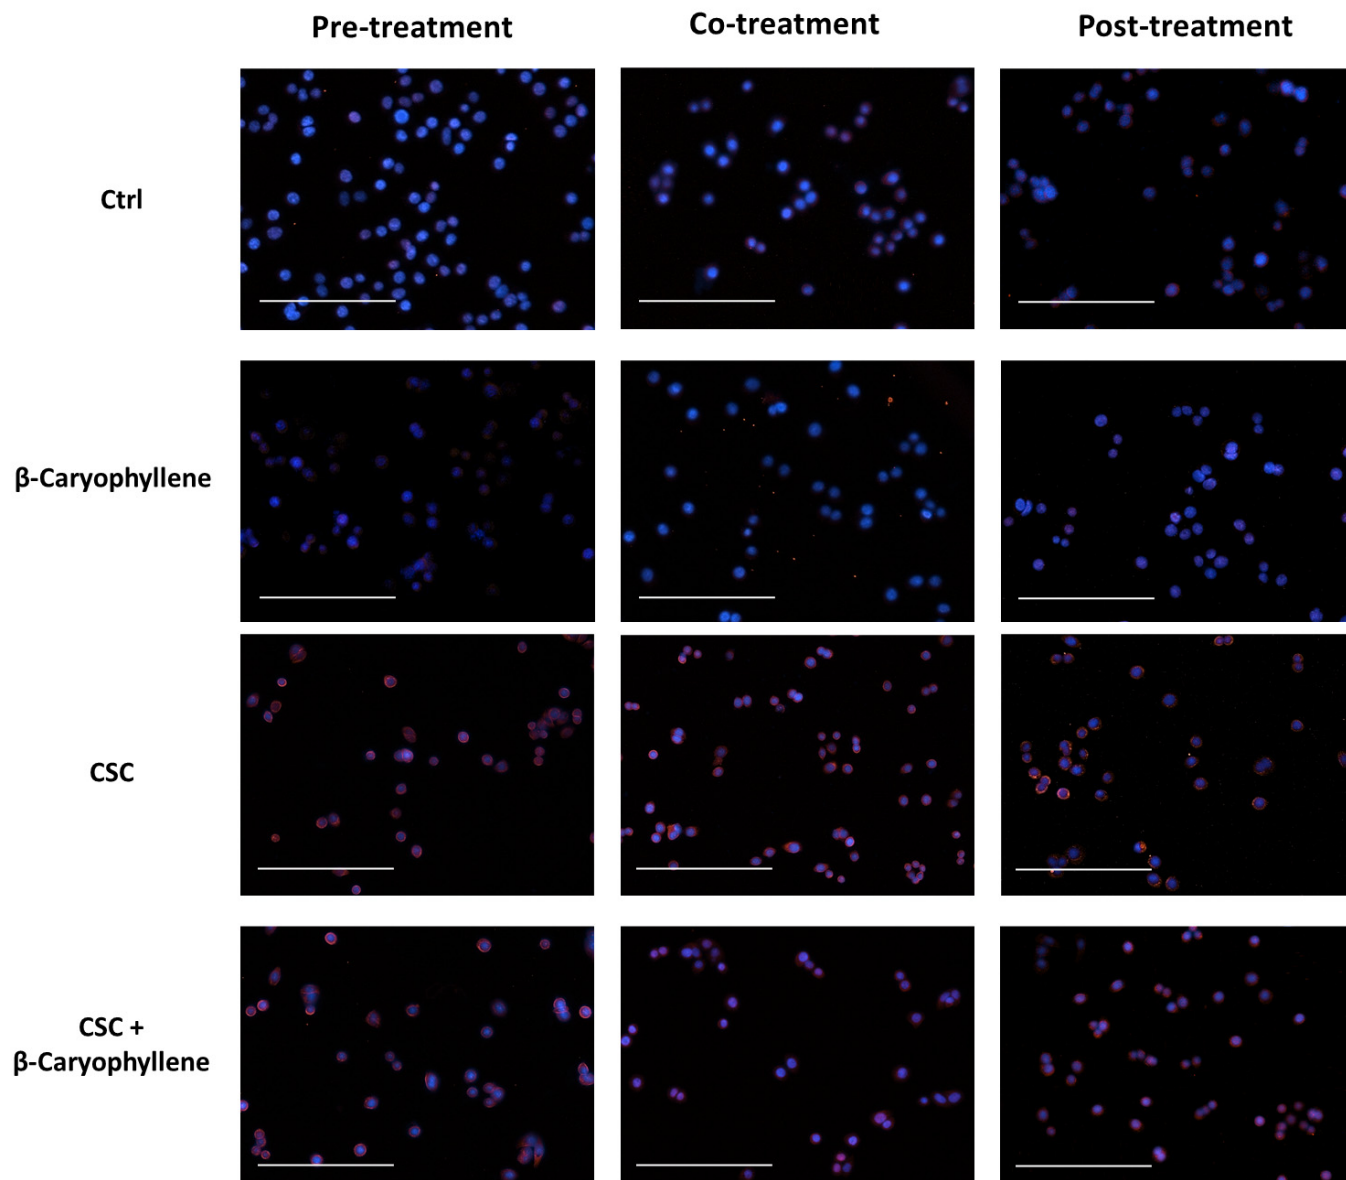

**Figure S2.** Modulation of phosphorylated H2AX histone ( $\gamma$ H2AX) by cigarette smoke condensate (CSC) 50  $\mu$ g/mL,  $\beta$ -caryophyllene 10  $\mu$ g/mL and their combination in triple negative breast MDA-MB-468 cells under pre, co- and post-treatment protocols. Representative images of cells, stained by an Alexa Fluor® 647 anti-gamma H2A.X (phospho S139) antibody and Hoechst 33258, were obtained at immunofluorescence analysis (original 10X magnification) using a Cytation 1 Cell Imaging Multimode Reader (Biotec, USA) and processed by Gen5™ Microplate Reader and Imager Software 3.11. Scale bars = 200  $\mu$ m.

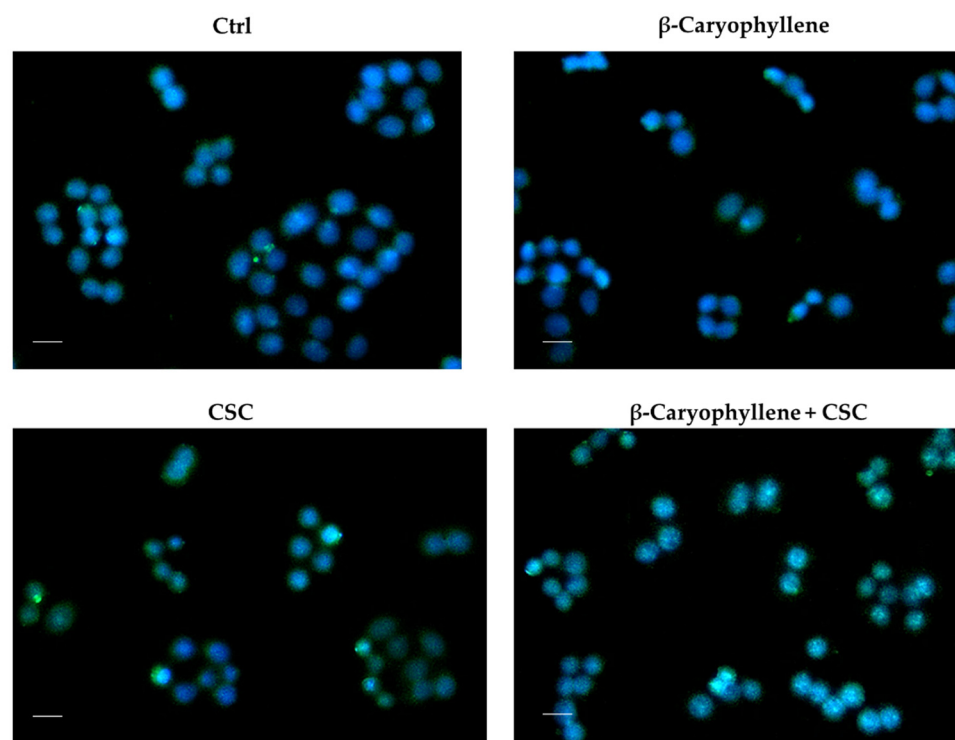

**Figure S3.** Apoptosis extent after a 3 h exposure to  $\beta$ -caryophyllene 10  $\mu\text{g/mL}$ , cigarette smoke condensate (CSC) 50  $\mu\text{g/mL}$ , and their combination in triple negative breast MDA-MB-468 cells. Representative images of cells, stained by Hoechst 33258/ Annexin-V-FITC, were obtained at immunofluorescence analysis (original 10X magnification) using a Cytation 1 Cell Imaging Multimode Reader (Biotek, USA) and processed by Gen5<sup>TM</sup> Microplate Reader and Imager Software 3.11. Scale bars = 20  $\mu\text{m}$ .

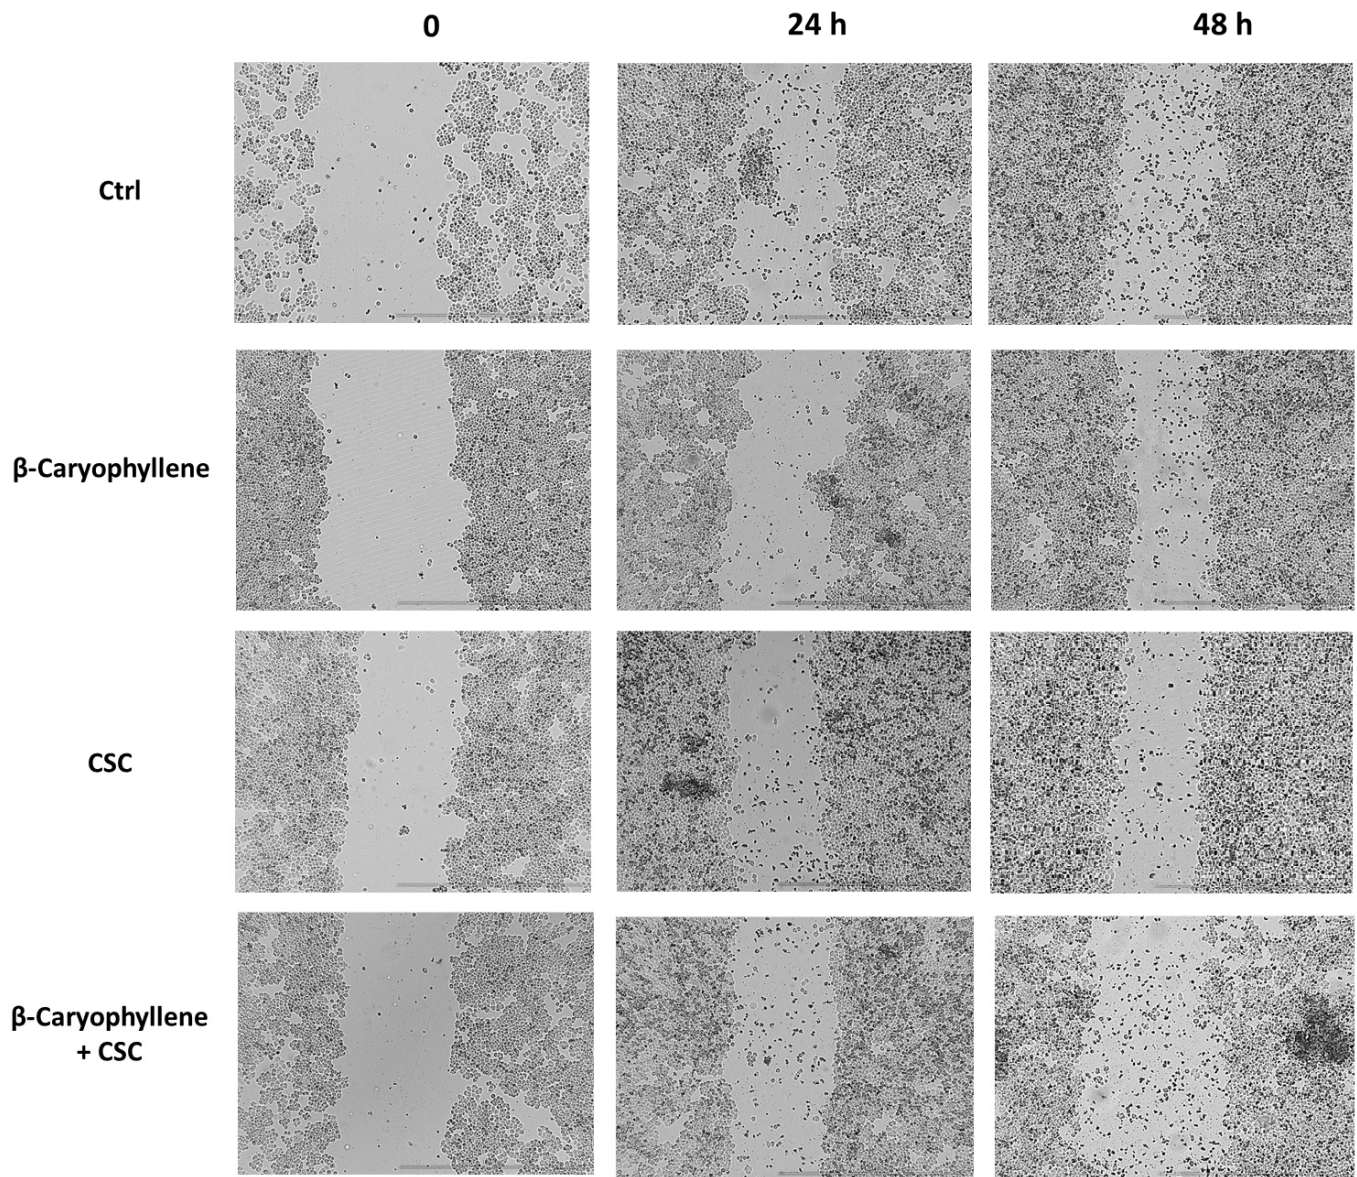

**Figure S4.** Original high contrast brightfield images (4X magnification) of wound healing in triple negative breast MDA-MB-468 cells were treated with cigarette smoke condensate (CSC) 50  $\mu\text{g/mL}$ ,  $\beta$ -caryophyllene 10  $\mu\text{g/mL}$  and their combination. Images were captured at zero time and after 24h and 48 h exposure, using a Cytation 1 Cell Imaging Multimode Reader (Biotech, USA) and processed by Gen5™ Microplate Reader and Imager Software 3.11. Scale bars = 1000  $\mu\text{m}$ .

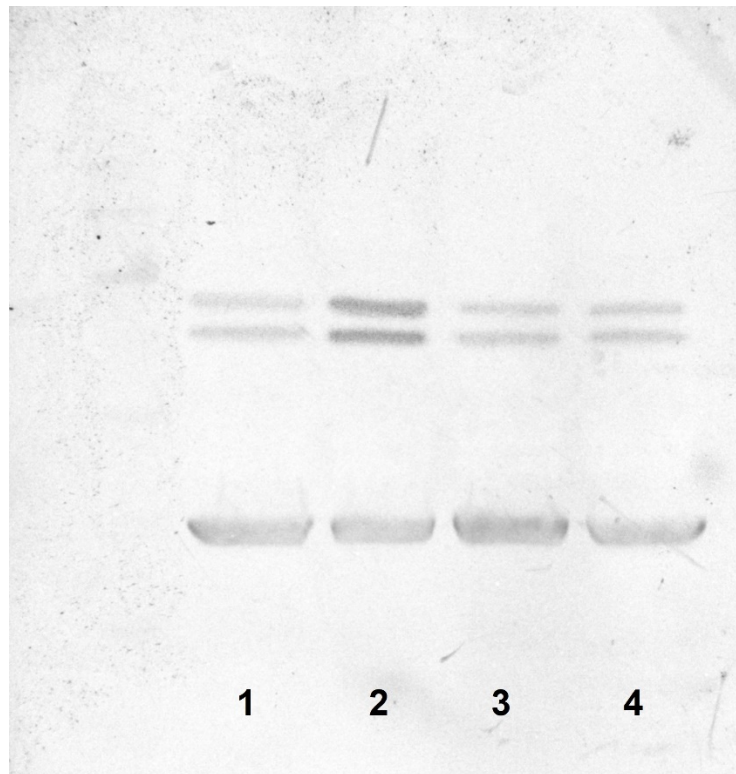

**Figure S5.** Original Western blotting membrane used to evaluate the expression levels of STAT3 phosphorylation at tyrosine 705 residue in triple negative breast MDA-MB-468 cells. 1) Control; 2) cigarette smoke condensate (CSC) 50 µg/mL; 3) β-caryophyllene 10 µg/mL; 4) β-caryophyllene 10 µg/mL + CSC 50 µg/mL.

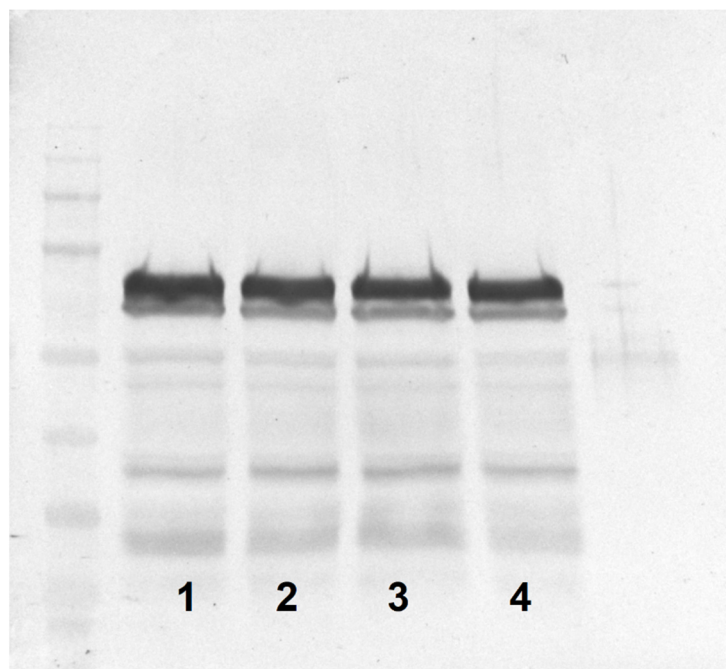

**Figure S6.** Original Western blotting membrane used to evaluate the expression levels of total STAT3 and β-actin in triple negative breast MDA-MB-468 cells. 1) Control; 2) cigarette smoke condensate (CSC) 50 µg/mL; 3) β-caryophyllene 10 µg/mL; 4) β-caryophyllene 10 µg/mL + CSC 50 µg/mL.
